# Supplementary material for: Oxidation of ethylene by Cu/TiO2: reducibility of Cu2+ in TiO2 as a possible descriptor of catalytic efficiency
Source: Royal Society of Chemistry journal article supplement (doi:10.1039/d2cy02170f), 2023-01-01
Supplement: d2cy02170f1.pdf [file d2cy02170f1.pdf]

# Electronic Supplementary Information (ESI)

## Oxidation of ethylene by Cu/TiO<sub>2</sub>: Reducibility of Cu<sup>2+</sup> in TiO<sub>2</sub> as a possible descriptor of catalytic efficiency.

Rajendran Karuppusamy<sup>a</sup>, Mandeep Sharma <sup>a</sup>, Augustine Jaison <sup>a</sup>, Menon Ankitha,

Ankit. D. Tiwari <sup>a</sup>, C. P. Vinod<sup>c</sup> and Dinesh Jagadeesan<sup>a,b\*</sup>

<sup>a</sup>Department of Chemistry, Indian Institute of Technology Palakkad, Kerala, 678557, India

<sup>b</sup>Environmental Sciences and Sustainable Engineering Centre (ESSENCE), Indian Institute of Technology Palakkad, Kerala, 678557, India.

<sup>c</sup>Inorganic Chemistry and Catalysis Division, CSIR – National Chemical Laboratory, Pashan, Pune – 411 008, Maharashtra, India.

\*Corresponding author: [d.jagadeesan@iitpkd.ac.in](mailto:d.jagadeesan@iitpkd.ac.in)

| S.No | Catalyst                 | CuSO <sub>4</sub> .5H <sub>2</sub> O (mg) | Ti(OC <sub>4</sub> H <sub>9</sub> ) <sub>4</sub> (g) | Ethanol (mL) | ICP-OES (Cu wt.%) |
|------|--------------------------|-------------------------------------------|------------------------------------------------------|--------------|-------------------|
| 1.   | 0.2% Cu/TiO <sub>2</sub> | 5.13                                      | 3.5                                                  | 30           | 0.21              |
| 2.   | 1% Cu/TiO <sub>2</sub>   | 25.66                                     | 3.5                                                  | 30           | 1.06              |
| 3.   | 3% Cu/TiO <sub>2</sub>   | 77.00                                     | 3.5                                                  | 30           | 3.38              |
| 4.   | 4% Cu/TiO <sub>2</sub>   | 102.67                                    | 3.5                                                  | 30           | 4.03              |

**Table S1** Data for the synthesis of Cu-doped TiO<sub>2</sub>.

ICP-OES (Inductively coupled plasma - optical emission spectrometry)

**Table S2**

weighted  
size (d) nm of  
doped TiO<sub>2</sub>  
Scherer

| S. NO | Catalyst                 | volume-weighted average grain size 'd' (nm) |
|-------|--------------------------|---------------------------------------------|
| 1.    | TiO <sub>2</sub>         | 10.3                                        |
| 2.    | 0.2% Cu/TiO <sub>2</sub> | 9.8                                         |
| 3.    | 1% Cu/TiO <sub>2</sub>   | 9.7                                         |

Volume-  
average grain  
TiO<sub>2</sub> and Cu  
calculated using  
equation

|    |                        |     |
|----|------------------------|-----|
| 4. | 3% Cu/TiO <sub>2</sub> | 7.5 |
| 5. | 4% Cu/TiO <sub>2</sub> | 7.4 |

**Scherer equation:  $d_{XRD} = K\lambda/W\cos\theta$**

$d_{XRD}$  = volume-weighted average grain size

K = Scherrer constant

$\lambda$  = Wavelength

W = peak width

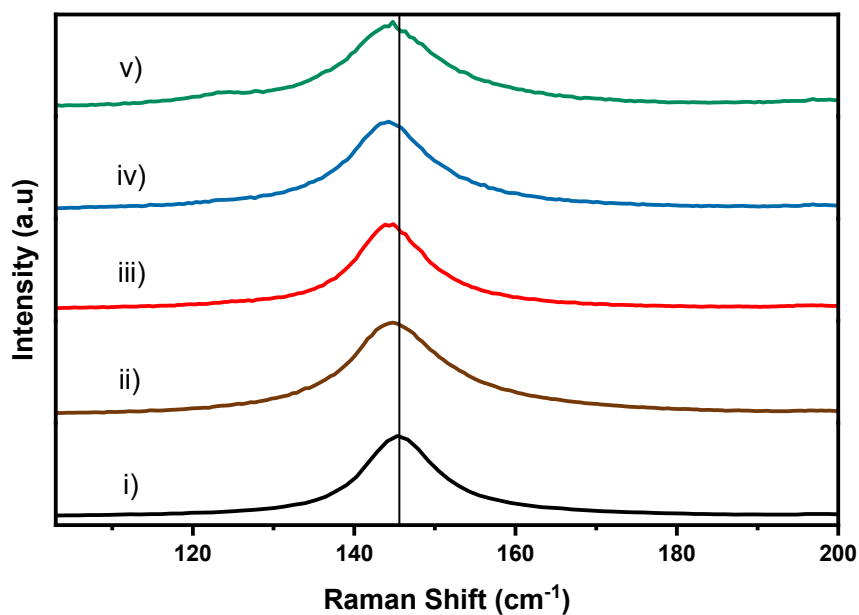

**Fig. S1** Enlarged image of 144.9  $\text{cm}^{-1}$  Raman shift i)  $\text{TiO}_2$  (black) ii) 0.2%  $\text{Cu/TiO}_2$  (brown) iii) 1%  $\text{Cu/TiO}_2$  (red) iv) 3%  $\text{Cu/TiO}_2$  (blue) v) 4%  $\text{Cu/TiO}_2$  (green).

**Table S3** Comparison of Temperature (K) of deconvoluted peaks in all the prepared catalyst

| Catalyst              | Temperature (K)                   |                                |                  |     |
|-----------------------|-----------------------------------|--------------------------------|------------------|-----|
|                       | $\text{Cu}^{2+}$ to $\text{Cu}^+$ | $\text{Cu}^+$ to $\text{Cu}^0$ | $\text{Ti}^{4+}$ |     |
| $\text{TiO}_2$        | –                                 | –                              | 770              | 880 |
| 0.2 $\text{Cu/TiO}_2$ | –                                 | –                              | 715              | 825 |
| 1 $\text{Cu/TiO}_2$   | 577                               | 615                            | 729              | 729 |
| 3 $\text{Cu/TiO}_2$   | 540                               | 583                            | 656              | 841 |
| 4 $\text{Cu/TiO}_2$   | 538                               | 611                            | 680              | 874 |

**Table S4** Comparison of H<sub>2</sub>-consumption (micromole/gram) of deconvoluted peaks in all the prepared catalyst

| Catalyst                | H <sub>2</sub> -Consumption (μmol/gram) |                                    |                  |        | Valence Ratio (Cu <sup>2+</sup> /<br>Cu <sup>+</sup> ) approx. |       |
|-------------------------|-----------------------------------------|------------------------------------|------------------|--------|----------------------------------------------------------------|-------|
|                         | Cu <sup>2+</sup> to<br>Cu <sup>+</sup>  | Cu <sup>+</sup> to Cu <sup>0</sup> | Ti <sup>4+</sup> |        |                                                                | Total |
| 0.2 Cu/TiO <sub>2</sub> | –                                       | –                                  | 311.4            | 990.8  | 1399.2                                                         |       |
| 1 Cu/TiO <sub>2</sub>   | 1411.8                                  | 2520.7                             | 1250.4           |        | 5182.9                                                         | 0.5   |
| 3 Cu/TiO <sub>2</sub>   | 582.8                                   | 1135.4                             | 4408.9           | 5747.6 | 11874.1                                                        | 0.5   |
| 4 Cu/TiO <sub>2</sub>   | 782.9                                   | 1040.2                             | 1425.7           | 3910.1 | 7158.9                                                         | 0.7   |

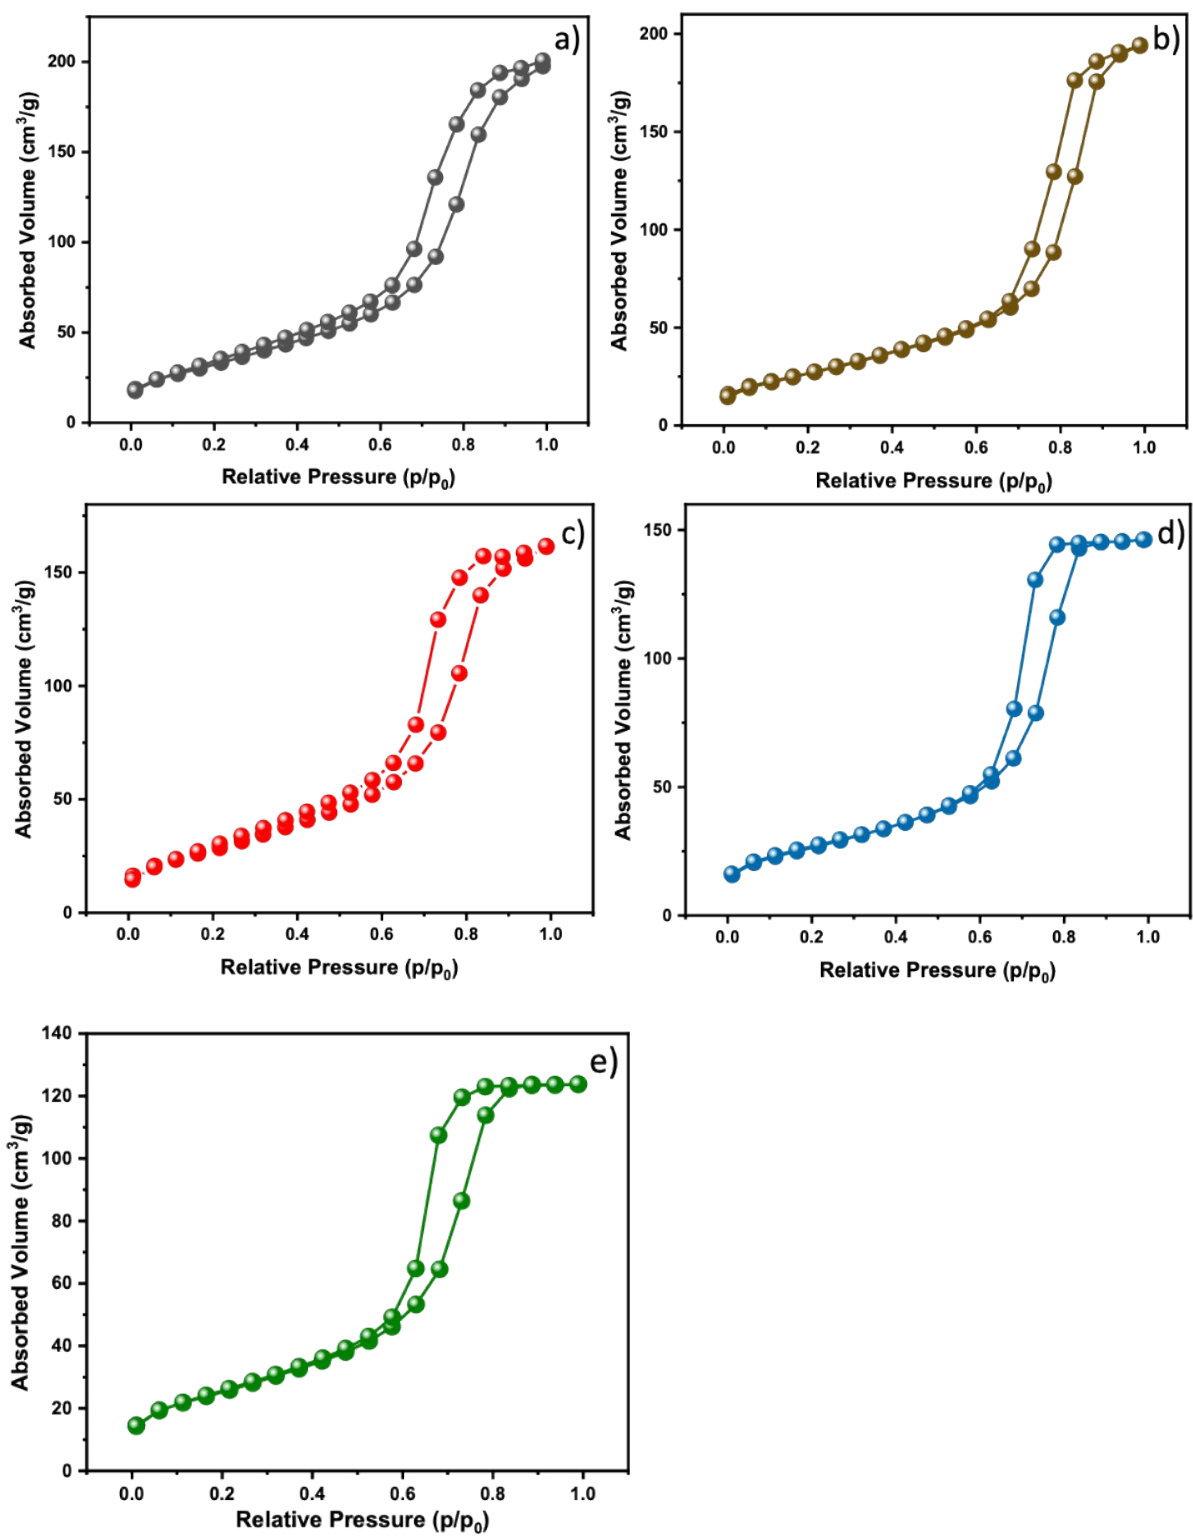

**Fig. S2** N<sub>2</sub> adsorption-desorption isotherm at 77K a) TiO<sub>2</sub> b) 0.2% Cu/TiO<sub>2</sub> c) 1% Cu/TiO<sub>2</sub> d) 3% Cu/TiO<sub>2</sub> e) 4% Cu/TiO<sub>2</sub>

**Table S5** BET surface area, average pore size and total pore volume analysis of TiO<sub>2</sub> and Cu/TiO<sub>2</sub> samples

| S.No | Catalyst                 | BET Surface Area (m <sup>2</sup> /g) | Average pore size (nm) | Total pore volume (cm <sup>3</sup> /g) |
|------|--------------------------|--------------------------------------|------------------------|----------------------------------------|
| 1    | TiO <sub>2</sub>         | 119.9                                | 5.0                    | 0.30                                   |
| 2    | 0.2% Cu/TiO <sub>2</sub> | 97.4                                 | 6.1                    | 0.30                                   |
| 3    | 1% Cu/TiO <sub>2</sub>   | 103.4                                | 4.8                    | 0.24                                   |
| 4    | 3% Cu/TiO <sub>2</sub>   | 94.3                                 | 4.7                    | 0.22                                   |
| 5    | 4% Cu/TiO <sub>2</sub>   | 91.0                                 | 4.2                    | 0.19                                   |

#### **BET and textural analysis**

The N<sub>2</sub> adsorption and desorption isotherms (Fig. S2) of prepared materials was of type IV, which indicates mesoporous materials.<sup>1</sup> The surface area and other textural parameters of the samples are shown in the Table S2. BET surface area of the pure anatase TiO<sub>2</sub> was calculated to be 119.9 m<sup>2</sup>/g, which was highest among all the materials. Increasing Cu concentration in TiO<sub>2</sub> lead to a slight decrease in surface area.<sup>1</sup> The average pore size of all the materials were around 4 - 6 nm which is in mesoporous range. Total pore volume and pore size also followed the same trend as BET surface area.

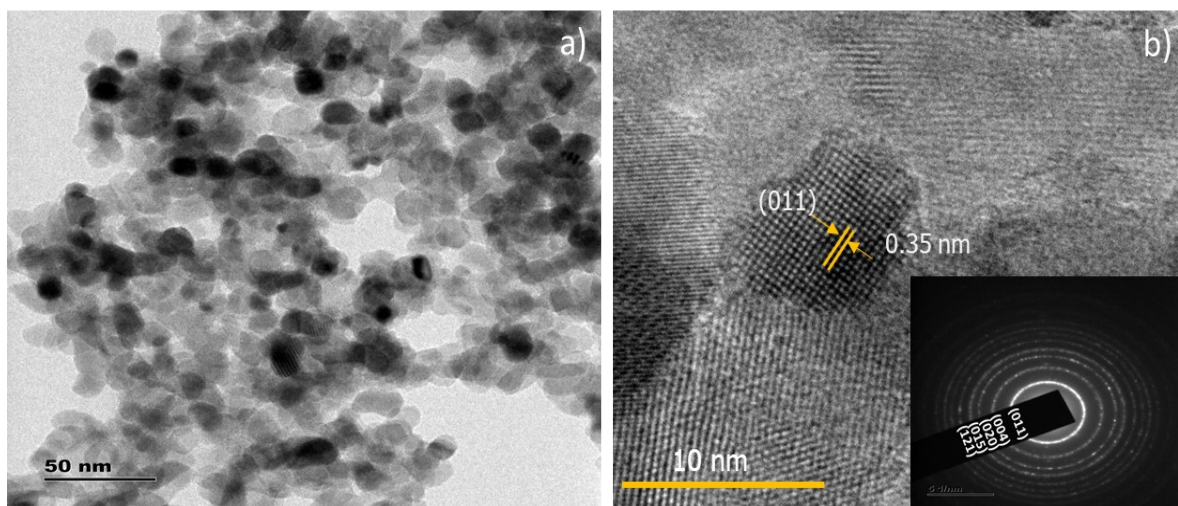

**Fig. S3** a) TEM micrographs of 1% Cu/TiO<sub>2</sub> b) HR-TEM and SAED pattern (inset) of 1% Cu/TiO<sub>2</sub>

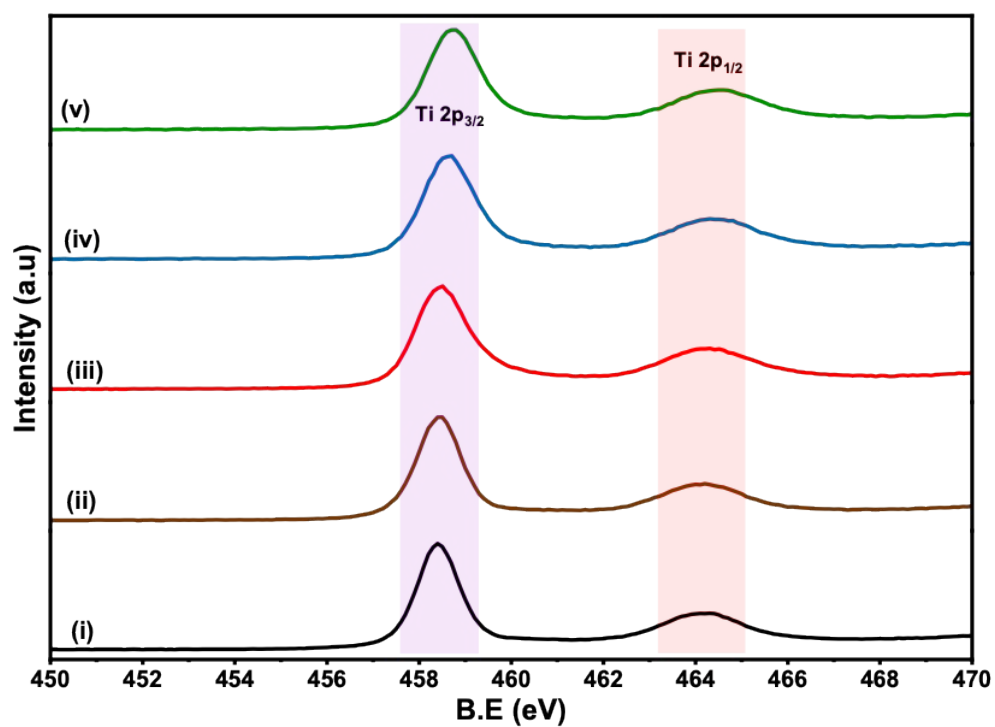

**Fig. S4** X-ray photoelectron spectra of Ti 2p i) TiO<sub>2</sub> ii) 0.2% Cu/TiO<sub>2</sub> iii) 1% Cu/TiO<sub>2</sub> iv) 3% Cu/TiO<sub>2</sub> v) 4% Cu/TiO<sub>2</sub>



**Table S6** Valence ratio of  $\text{Cu}^{2+}/\text{Cu}^+$  in all the prepared catalyst using X-ray photoelectron spectroscopy.

| Catalyst               | Peak 1 ( $\text{Cu}^+$ ) Area | Peak 2 ( $\text{Cu}^{2+}$ ) Area | Valence Ratio( $\text{Cu}^{2+}/\text{Cu}^+$ )<br>approx. |
|------------------------|-------------------------------|----------------------------------|----------------------------------------------------------|
| 0.2 Cu/ $\text{TiO}_2$ | 6095                          | 0                                | 0                                                        |
| 1 Cu/ $\text{TiO}_2$   | 19872                         | 4152                             | 0.2                                                      |
| 3 Cu/ $\text{TiO}_2$   | 23347                         | 10989                            | 0.5                                                      |
| 4 Cu/ $\text{TiO}_2$   | 29701                         | 26186                            | 0.9                                                      |

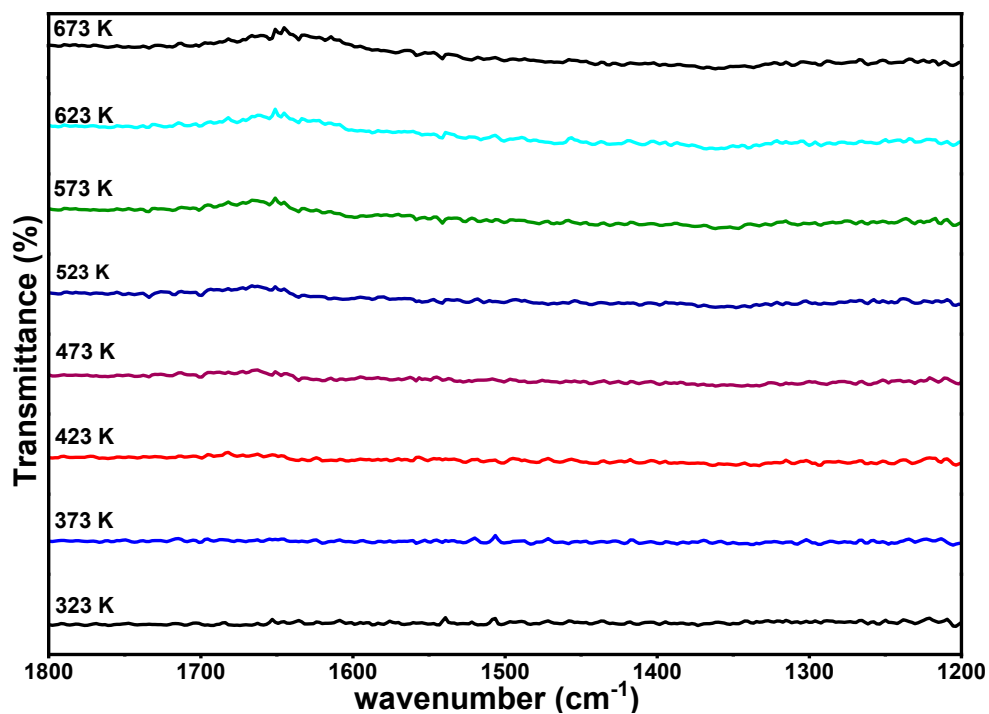

**Fig. S5** CO<sub>2</sub> DRIFT of 1% Cu/ $\text{TiO}_2$

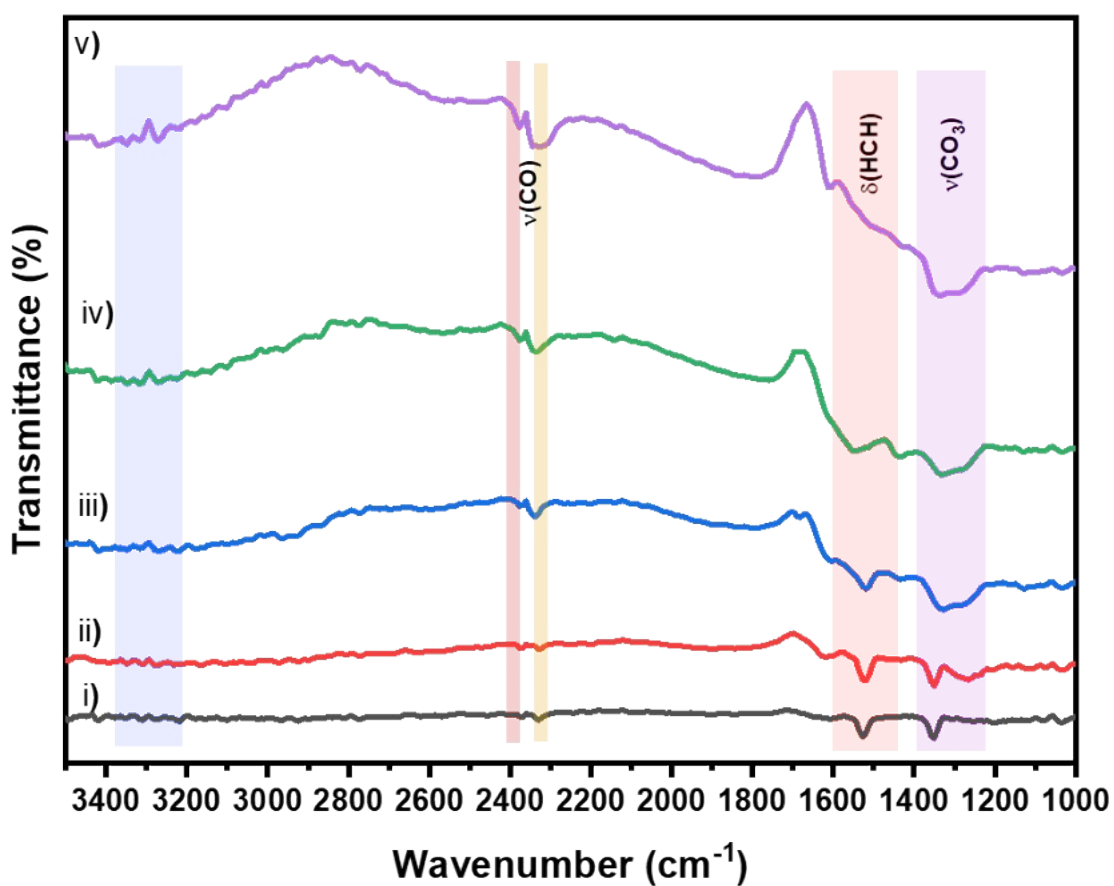

**Fig. S6** DRIFTS measurement during oxidation of ethylene using 1% Cu/TiO<sub>2</sub> with the mixture of ethylene (1.5 vol %) and oxygen (5.9 vol %) at (i) 298 K; (ii) 373 K; (iii) 473 K; (iv) 573 K; (v) 673 K.

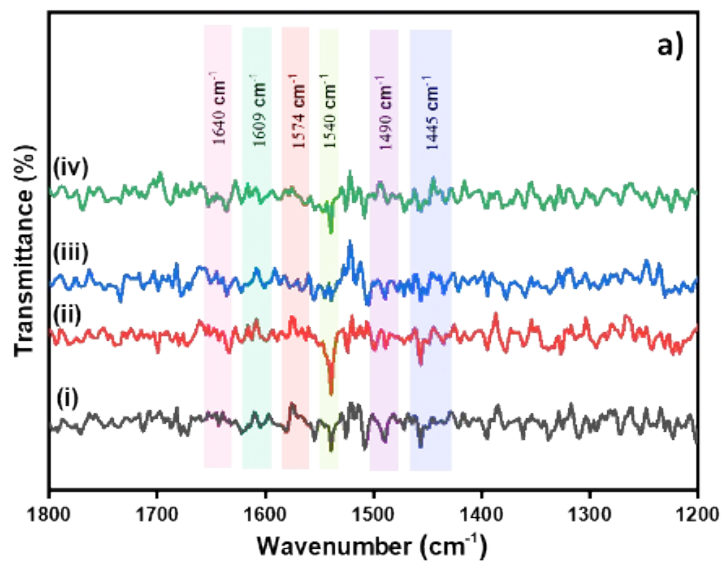

**Fig. S7** a) Pyridine DRIFTS of  $\text{TiO}_2$  i) 323 K ii) 373 K iii) 473 K iv) 573K

## Reference

1. T. Sreethawong and S. Yoshikawa, *Catalysis Communications*, 2005, **6**, 661-668.
